# Supplementary material for: Dual inhibition of the terminal oxidases eradicates antibiotic‐tolerant Mycobacterium tuberculosis
Source: PubMed Central journal article supplement (PMC7799364; doi:10.15252/emmm.202013207), 2020-12-07
Supplement: EMMM-13-e13207-s001.pdf [file EMMM-13-e13207-s001.pdf]

## Appendix

Dual inhibition of the terminal oxidases eradicates antibiotic-tolerant *Mycobacterium tuberculosis*

### Table of Contents

#### **Appendix Figures**

Appendix Figure S1

Appendix Figure S2

Appendix Figure S3

#### **Appendix Tables**

Appendix Table S1

Appendix Table S2

Appendix Table S3

Appendix Table S4

Appendix Table S5

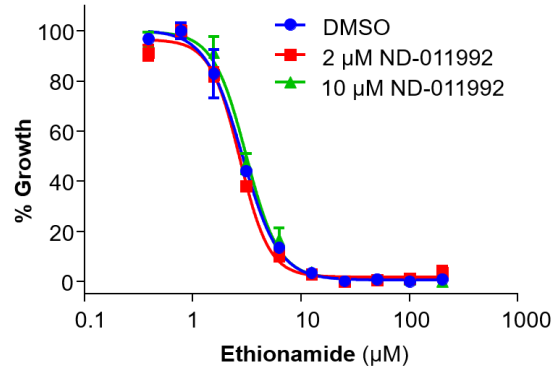

**APPENDIX FIGURE S1. Effect of ND-011992 treatment in Ethionamide minimum inhibitory concentration (MIC).** *M. tuberculosis* H37Rv cultures were treated with varying concentrations of ethionamide in the presence of DMSO (blue circles), 2 μM ND-011992 (red squares), or 10 μM ND-011992 (green triangles). Data are expressed as the mean ± S.D. of triplicates for each condition.

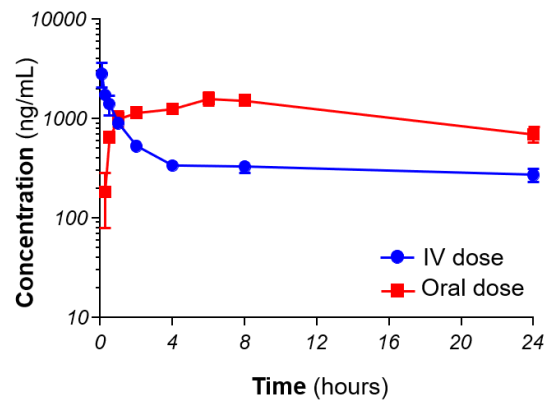

**APPENDIX FIGURE S2. Plasma concentration of ND-011992 after intravenous and oral dosing in male Swiss albino mice.** Plasma concentration of ND-011992 was quantified over a 24-hour period after an intravenous (IV) dose of 2 mg/kg (blue circles) or oral administration of 10 mg/kg (red squares).

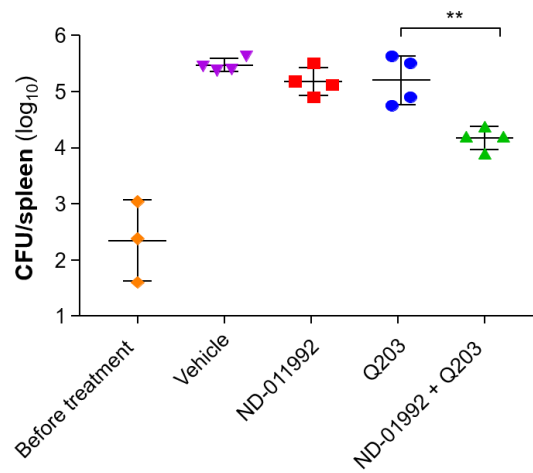

**APPENDIX FIGURE S3. The drug combination ND-011992/Q203 reduces bacterial load in the spleen of *M. tuberculosis*-infected mice.** Efficacy of ND-011992-Q203 combination treatment in a mouse model of acute tuberculosis. Bacterial load (CFU) were enumerated in the spleen of mice before treatment (orange diamonds), or after 5 daily oral administration of vehicle control (purple triangles), 5 mg/kg Q203 (blue circles), 25 mg/kg ND-011992 (red squares), or 25 mg/kg ND-011992 + 5 mg/kg Q203 (green triangles). \*\*P < 0.01, unpaired Student's t-test, two-tailed; n = 4.

**APPENDIX TABLE S1. Cyt-*bd* over-expression reduced the potency of ND-011992.** *M. bovis* BCG (transformed with empty pMV262 vector or pMV262-*cydABDC*) strains were treated with a dose-range of ND-011992, Q203, or BDQ for 15 hours before quantification of intracellular ATP levels.

|                        | ATP IC <sub>50</sub> (μM) |                   |               |
|------------------------|---------------------------|-------------------|---------------|
|                        | ND-011992                 | Q203              | BDQ           |
| pMV262                 | 0.52 ± 0.014              | 0.0010 ± 0.000045 | 0.16 ± 0.0069 |
| pMV262- <i>cydABDC</i> | 17.2 ± 3.64               | 0.0012 ± 0.000206 | 0.19 ± 0.014  |

**APPENDIX TABLE S2. Minimum Inhibitory Concentration 50% (MIC<sub>50</sub>) of ND-011992 in *M. tuberculosis* H37Rv  $\Delta$ actaE-qcrCAB.**

| MIC <sub>50</sub> ( $\mu$ M)         | Repeat 1  |      | Repeat 2  |      |
|--------------------------------------|-----------|------|-----------|------|
|                                      | ND-011992 | BDQ  | ND-011992 | BDQ  |
| WT H37Rv                             | 25.2      | 1.02 | 25.5      | 0.50 |
| $\Delta$ actaE-qcrCAB                | 0.76      | 0.56 | 0.23      | 0.33 |
| $\Delta$ actaE-qcrCAB:: <i>comp.</i> | 3.54      | 0.63 | 20.0      | 0.65 |

**APPENDIX TABLE S3. Frequency of spontaneous resistance to ND-011992 + Q203 in *M. tuberculosis* H37Rv and *M. bovis* BCG.**

| Drug concentration ( $\mu\text{M}$ ) |           | Frequency of Resistance |                         |
|--------------------------------------|-----------|-------------------------|-------------------------|
| Q203                                 | ND-011992 | H37Rv                   | BCG                     |
|                                      | 0         | $2.4 \times 10^{-8}$    | $1.0 \times 10^{-8}$    |
| 0.1                                  | 6         | $2.1 \times 10^{-9}$    | $6.6 \times 10^{-9}$    |
|                                      | 10        | $< 2.3 \times 10^{-10}$ | $3.7 \times 10^{-10}$   |
|                                      | 0         | N.D.                    | $6.7 \times 10^{-9}$    |
| 0.5                                  | 6         | N.D.                    | $7.3 \times 10^{-10}$   |
|                                      | 10        | N.D.                    | $< 3.7 \times 10^{-10}$ |

**APPENDIX TABLE S4. *In vitro* pharmacokinetic and toxicity of ND-011992**

|                            |                                                                       |       |                                                           |                              |
|----------------------------|-----------------------------------------------------------------------|-------|-----------------------------------------------------------|------------------------------|
| <b>Metabolic stability</b> | Stability in mouse plasma<br>(% remaining after 2h)                   |       | 110.3%<br>(Proprantheline bromide: 12.1%)                 |                              |
|                            | Stability in simulated gastric fluid<br>(% remaining after 24h)       |       | 99.02%<br>(omeprazole: 0.00%)                             |                              |
|                            | Microsomal stability                                                  | Human | CL <sub>int</sub> , $\mu\text{L min}^{-1} \text{mg}^{-1}$ | 15.7                         |
|                            |                                                                       |       | % remaining after 60 min                                  | 58.1%<br>(Propafenone: 0.4%) |
|                            |                                                                       | Mouse | CL <sub>int</sub> , $\mu\text{L min}^{-1} \text{mg}^{-1}$ | <9.6                         |
| % remaining after 60 min   |                                                                       |       | 87.6%<br>(Propafenone: 0.2%)                              |                              |
| <b>Drug permeability</b>   | Caco2 assay<br>(mean P <sub>app</sub> , $10^{-6} \text{ cm s}^{-1}$ ) |       | <0.48                                                     |                              |
| <b>Cytotoxicity</b>        | HepG2 (IC <sub>50</sub> )                                             |       | >20 $\mu\text{M}$                                         |                              |



**APPENDIX TABLE S5. Pharmacokinetic properties of ND-011992 in mice after intravenous (IV) and oral (PO) administration**

|                       |           | <b>IV</b> | <b>PO</b> |
|-----------------------|-----------|-----------|-----------|
| Dose                  | mg/kg     | 2.00      | 10.00     |
| C <sub>max</sub>      | ng/mL     | 3583.45   | 1601.80   |
| T <sub>max</sub>      | H         | -         | 6.00      |
| V <sub>d</sub>        | L/kg      | 5.35      | -         |
| Cl                    | mL/min/kg | 0.96      | -         |
| T <sub>1/2</sub>      | h         | 64.11     | >18       |
| AUC <sub>0-last</sub> | ng·h/mL   | 9298.20   | 26954.80  |
| AUC <sub>0-∞</sub>    | ng·h/mL   | 34603.48  | 41694.93  |
| AUC <sub>extra</sub>  | %         | 73.13     | 35.35     |
| MRT <sub>0-last</sub> | h         | 9.46      | 11.10     |
| F                     | %         | -         | 57.98     |
